# Supplementary material
Source: publisher site journal article supplement (https://www.dovepress.com/article/193963)
Supplement: Supplementary file 1 [file get_supplementary_file.php]

**Supplemental data from preliminary experiments**

Journal: 　**International Journal of Nanomedicine**　　　　**Submission ID: 193963**

Takanori Kumai, MD., St. Marianna University School of Medicine

**1) Organ culture of bone mallow cells into the self-organized scaffold (2-week incubation)**

To evaluate the osteochondral potential of the scaffold *in vitro*, we had done the organ culture of rabbit bone marrow cells into the self-assembled biphasic cartilage and bone like scaffold with hydroxyapatite (2-week organ culture in the flask with culture medium at 37°C in a humidified 95% air and 5% CO2 atmosphere).

**i) 　Chondrocyte differentiation and growth from rat bone marrow cells (mesenchymal**

**stem cells) into the scaffold (organ culture *in vitro*)**

**
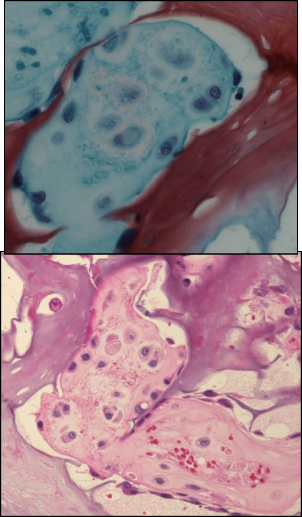
**After 2-week organ culture *in vitro*, we found the **chondrocyte like cells with rounded/spheroidal morphology** and **typical cartilage lacuna formation into the scaffold.**


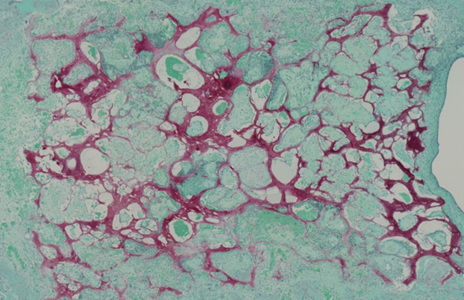
Self-organized scaffolds (safranin O positive: proteoglycan) chondrocytes and lacuna

In this preliminary experiment, the organ culture of bone mallow cells into the self-assembled may suggest the chondrogenic potential of the scaffold [**chondrocyte differentiation from bone marrow cells (including mesenchymal stem cells), chondrocyte growth and survival**]

**ii) Expressions of chondrogenic and osteogenic makers of cells derived from the organ culture of the scaffold.**

In the other experiment of organ culture of the scaffold,

1. the scaffold was washed with PBS and treated with collagenase overnight.
2. Then after centrifugation, cell pellet was collected.
3. From the cell pellet, cellular proteins were isolated (the cell pellet was derived from 　　　inoculated bone marrow cells into the organ cultured scaffold.)
4. Using the cellular proteins, chondrogenic and osteogenic makers were analyzed *in vitro*.

- Chondrocyte specific marker: aggrecan
- Osteoblast specific marker: osteocalcin (marker of mature osteoblast)

**
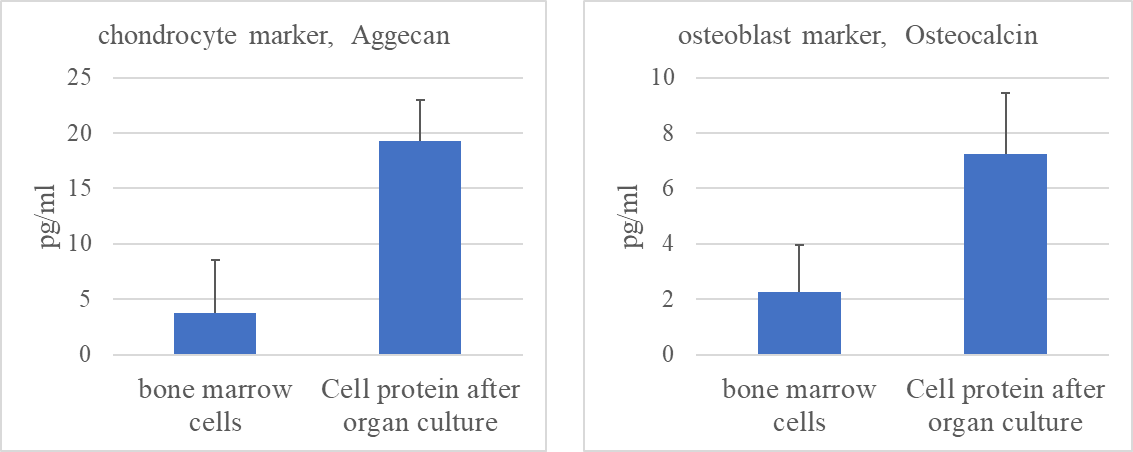
**

Both levels of concentrations of chondrocyte marker and osteoblast marker are significantly higher in cell protein derived from organ cultured bone marrow cells into the scaffold than in original bone marrow cells.

These findings suggest that the scaffolds may induce chondrogenesis and osteogenesis from bone marrow cells (including rat mesenchymal stem cells).

**Although further studies are needed to clarify whether our scaffolds have the chondrogenic and osteogenic potentials, these *in vitro* findings (results in Figure 2C and preliminary data above mentioned) may indicate that our scaffolds are environment suitable for chondrocyte/osteoblast differentiation from bone marrow cells, cell growth and survival*.***

**2) Preliminary *in vivo* experiment for the present study**

We show the representative image of HE and Safranin O staining of the self-assembled cartilage like scaffold-inoculated knee joint in **preliminary *in vivo* experiments (rabbit knee osteochondral defect model).**


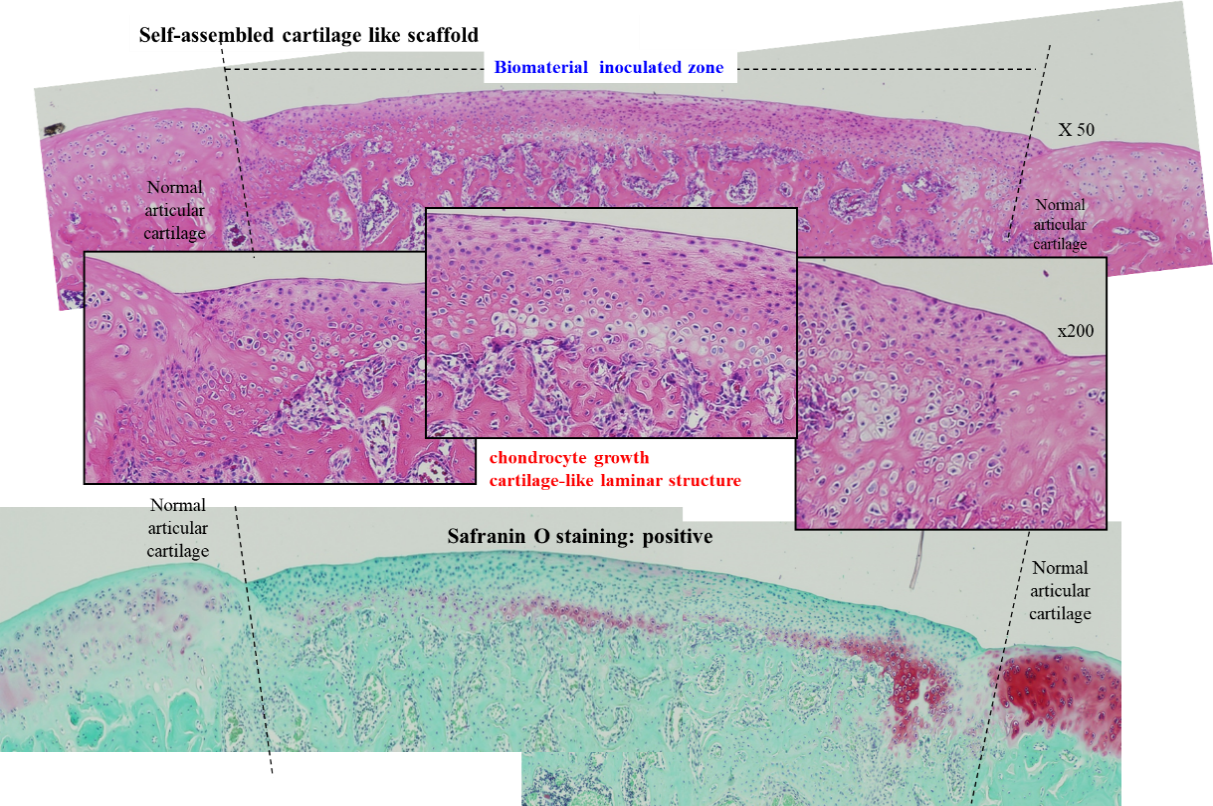


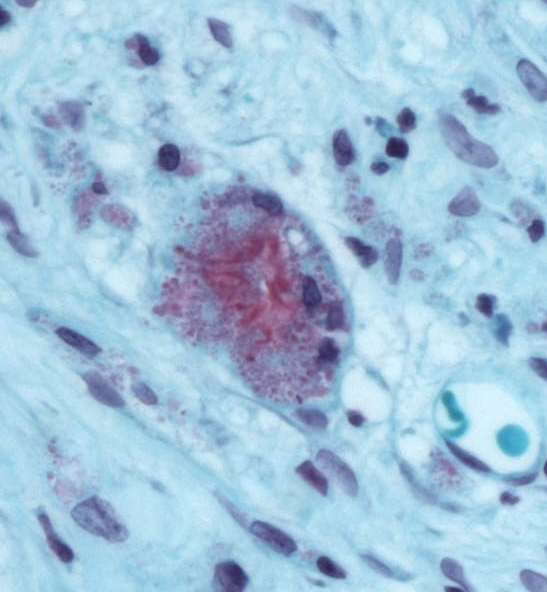

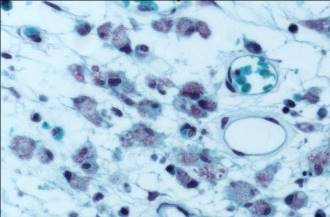

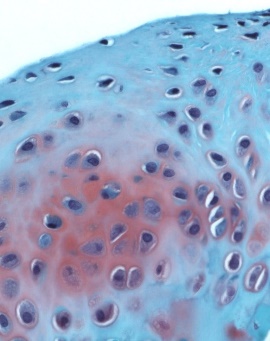


**Typical cartilage lacuna formation into the inoculated scaffolds**


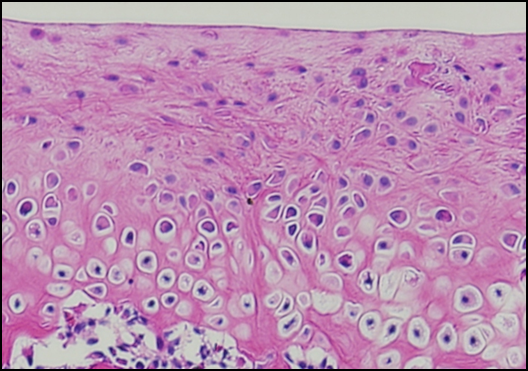


We can observe the **safranin O positive-cytoplasmic staining in chondrocytes with typical rounded/spheroidal morphology** and **typical cartilage lacuna formation** into the inoculated scaffold**.** Safranin O staining positive-cytoplasmic staining means the expression of chondrocyte marker, proteoglycan, into the cells, indicating that the cells into the scaffold are chondrocytes.

Also, the degree of regeneration/repair of cartilage/subchondral bone (repair of osteochondral defect/degeneration) by biomaterials were macroscopically analyzed according to the cartilage repair scoring system (ICRS II: International Cartilage Repair Society). **From the results of this *in vivo* experiment, we can observe and estimate the degree of osteochondral tissue repair by each biomaterial**.
